# Supplementary material
Source: MDPI journal article supplement (https://www.mdpi.com/2076-3417/12/9/4770)
Supplement: s1 [file s1]

**Supplementary S1**

| Leaf No. | Length(cm) | Width(cm) | Leaf_Area(cm <sup>2</sup> ) |
|----------|------------|-----------|-----------------------------|
| 1        | 10.517     | 2.977     | 21.926                      |
| 2        | 9.681      | 2.818     | 20.666                      |
| 3        | 10.741     | 2.308     | 19.692                      |
| 4        | 10.642     | 2.35      | 19.462                      |
| 5        | 10.955     | 2.407     | 20.878                      |
| 6        | 10.677     | 2.34      | 20.383                      |
| 7        | 10.257     | 1.9       | 15.621                      |
| 8        | 10.131     | 1.933     | 15.416                      |
| 9        | 10.103     | 1.918     | 15.386                      |
| 10       | 10.676     | 1.999     | 16.94                       |
| 11       | 11.952     | 2.218     | 19.758                      |
| 12       | 11.597     | 2.13      | 18.129                      |
| 13       | 11.474     | 2.062     | 17.764                      |
| 14       | 12.052     | 2.126     | 18.299                      |
| 15       | 10.983     | 1.957     | 14.745                      |
| 16       | 10.871     | 2.4       | 19.435                      |
| 17       | 10.792     | 2.444     | 18.73                       |
| 18       | 10.482     | 2.322     | 17.612                      |
| 19       | 12.328     | 2.52      | 23.362                      |
| 20       | 9.693      | 2.473     | 18.682                      |
| 21       | 9.893      | 2.512     | 19.732                      |
| 22       | 9.652      | 2.466     | 18.879                      |
| 23       | 10.102     | 2.478     | 19.727                      |
| 24       | 9.99       | 2.502     | 19.252                      |
| 25       | 13.36      | 2.243     | 23.799                      |
| 26       | 13.277     | 2.3       | 23.014                      |
| 27       | 14.199     | 2.408     | 25.983                      |
| 28       | 13.612     | 2.382     | 24.816                      |
| 29       | 14.043     | 2.345     | 26.179                      |
| 30       | 13.23      | 2.177     | 23.343                      |
| 31       | 12.863     | 2.26      | 23.199                      |
| 32       | 12.647     | 2.362     | 23.505                      |
| 33       | 13.157     | 2.412     | 24.561                      |
| 34       | 12.961     | 2.265     | 22.213                      |
| 35       | 12.338     | 2.199     | 20.156                      |
| 36       | 12.911     | 2.226     | 21.683                      |
| 37       | 12.409     | 2.231     | 22.754                      |
| 38       | 13.501     | 2.486     | 26.559                      |
| 39       | 13.822     | 2.496     | 28.297                      |
| 40       | 14.201     | 2.559     | 29.355                      |
| 41       | 13.655     | 2.471     | 26.769                      |
| 42       | 13.447     | 2.48      | 26.33                       |
| 43       | 13.446     | 2.447     | 26.487                      |
| 44       | 11.384     | 2.454     | 21.079                      |
| 45       | 11.694     | 2.479     | 22.804                      |
| 46       | 11.829     | 2.535     | 23.244                      |

---

|    |        |       |        |
|----|--------|-------|--------|
| 47 | 12.011 | 2.451 | 22.907 |
| 48 | 11.985 | 2.595 | 23.602 |
| 49 | 11.512 | 2.397 | 21.7   |
| 50 | 11.67  | 2.444 | 22.166 |
| 51 | 11.553 | 2.138 | 19.323 |
| 52 | 11.596 | 2.185 | 20.342 |
| 53 | 12.06  | 2.32  | 22.684 |
| 54 | 11.743 | 2.157 | 20.953 |
| 55 | 10.076 | 2.073 | 16.624 |
| 56 | 10.184 | 2.169 | 16.315 |
| 57 | 11.263 | 2.353 | 20.009 |
| 58 | 10.781 | 2.309 | 18.625 |
| 59 | 11.282 | 2.42  | 21.513 |
| 60 | 11.382 | 2.5   | 22.229 |
| 61 | 11.539 | 2.569 | 23.019 |
| 62 | 11.656 | 2.625 | 23.926 |
| 63 | 13.35  | 2.751 | 26.254 |
| 64 | 13.346 | 2.754 | 26.778 |
| 65 | 12.741 | 2.591 | 24.261 |
| 66 | 12.747 | 2.56  | 24.18  |
| 67 | 12.367 | 2.88  | 26.279 |
| 68 | 12.793 | 3.007 | 27.92  |
| 69 | 11.261 | 2.738 | 21.939 |
| 70 | 11.71  | 2.786 | 24.064 |
| 71 | 12.071 | 2.777 | 24.912 |
| 72 | 12.047 | 2.86  | 24.781 |
| 73 | 11.429 | 2.822 | 23.769 |
| 74 | 11.442 | 2.704 | 22.904 |
| 75 | 11.675 | 2.867 | 24.579 |
| 76 | 11.124 | 2.988 | 26.584 |
| 77 | 12.014 | 3.238 | 31.053 |
| 78 | 11.794 | 3.228 | 30.187 |
| 79 | 12.034 | 3.23  | 31.25  |
| 80 | 11.821 | 3.322 | 31.077 |
| 81 | 12.09  | 3.57  | 33.652 |
| 82 | 12.136 | 3.574 | 33.382 |
| 83 | 12.105 | 3.575 | 33.387 |
| 84 | 10.7   | 2.178 | 17.575 |
| 85 | 10.139 | 1.969 | 15.55  |
| 86 | 10.13  | 2.036 | 15.522 |
| 87 | 10.067 | 1.971 | 15.567 |
| 88 | 10.308 | 2.047 | 16.184 |
| 89 | 10.074 | 1.974 | 15.469 |
| 90 | 12.662 | 2.506 | 25.066 |
| 91 | 12.581 | 2.548 | 25.424 |
| 92 | 12.358 | 2.508 | 24.745 |
| 93 | 12.473 | 2.534 | 24.916 |
| 94 | 12.98  | 2.658 | 27.579 |

---

---

|     |        |       |        |
|-----|--------|-------|--------|
| 95  | 13.059 | 2.577 | 27.674 |
| 96  | 12.616 | 2.493 | 25.866 |
| 97  | 12.748 | 2.564 | 26.462 |
| 98  | 11.412 | 2.156 | 18.731 |
| 99  | 11.718 | 2.241 | 20.124 |
| 100 | 10.96  | 2.115 | 17.963 |
| 101 | 11.034 | 2.105 | 18.308 |
| 102 | 11.437 | 2.189 | 19.494 |
| 103 | 8.792  | 1.866 | 13.416 |
| 104 | 8.904  | 1.839 | 13.282 |
| 105 | 9.433  | 1.919 | 14.53  |
| 106 | 9.249  | 1.989 | 14.822 |
| 107 | 9.293  | 2.121 | 16.062 |
| 108 | 9.475  | 2.102 | 16.037 |
| 109 | 9.838  | 2.158 | 17.132 |
| 110 | 9.68   | 2.126 | 16.915 |
| 111 | 11.456 | 2.038 | 18.235 |
| 112 | 11.817 | 2.444 | 21.435 |
| 113 | 11.67  | 2.403 | 20.544 |
| 114 | 11.726 | 2.346 | 20.409 |
| 115 | 12.268 | 2.525 | 23.722 |
| 116 | 12.491 | 2.538 | 24.479 |
| 117 | 11.376 | 2.89  | 26.486 |
| 118 | 11.348 | 2.758 | 26.112 |
| 119 | 11.449 | 2.84  | 26.738 |
| 120 | 11.672 | 2.849 | 27.451 |
| 121 | 11.296 | 2.829 | 25.52  |
| 122 | 11.168 | 2.775 | 24.879 |
| 123 | 11.473 | 2.893 | 26.102 |
| 124 | 11.106 | 2.897 | 24.747 |
| 125 | 10.849 | 2.874 | 24.501 |
| 126 | 11.306 | 3.036 | 26.42  |
| 127 | 10.751 | 2.806 | 23.687 |
| 128 | 12.16  | 3.141 | 30.199 |
| 129 | 12.381 | 3.038 | 28.649 |
| 130 | 11.795 | 2.987 | 27.325 |
| 131 | 12.174 | 3.053 | 28.103 |
| 132 | 11.982 | 2.886 | 26.273 |
| 133 | 11.305 | 2.23  | 20.525 |
| 134 | 10.961 | 1.982 | 18.256 |
| 135 | 10.846 | 1.984 | 17.358 |
| 136 | 11.42  | 2.111 | 19.63  |
| 137 | 10.779 | 2.127 | 17.907 |
| 138 | 10.683 | 1.924 | 17.045 |
| 139 | 11.604 | 2.205 | 20.945 |
| 140 | 11.891 | 2.022 | 20.93  |
| 141 | 11.223 | 2.019 | 18.978 |
| 142 | 9.823  | 1.777 | 12.363 |

---

---

|     |        |       |        |
|-----|--------|-------|--------|
| 143 | 9.585  | 1.77  | 11.883 |
| 144 | 9.638  | 1.814 | 12.468 |
| 145 | 9.021  | 1.872 | 14.92  |
| 146 | 8.879  | 2.024 | 15.508 |
| 147 | 9.072  | 1.995 | 15.968 |
| 148 | 9.189  | 2.09  | 16.384 |
| 149 | 12.5   | 2.309 | 23.865 |
| 150 | 11.08  | 2.294 | 21.42  |
| 151 | 11.097 | 1.77  | 14.773 |
| 152 | 11.346 | 1.825 | 14.819 |
| 153 | 11.416 | 1.819 | 15.384 |
| 154 | 11.158 | 1.795 | 15.127 |
| 155 | 9.901  | 2.514 | 19.513 |
| 156 | 9.75   | 2.401 | 18.429 |
| 157 | 10.321 | 2.517 | 20.485 |
| 158 | 10.677 | 2.57  | 21.335 |
| 159 | 10.203 | 2.45  | 20.18  |
| 160 | 10.796 | 2.109 | 15.988 |
| 161 | 9.672  | 1.905 | 13.273 |
| 162 | 10.432 | 2.104 | 15.245 |
| 163 | 10.574 | 2.033 | 15.017 |
| 164 | 8.884  | 2.461 | 16.288 |
| 165 | 8.833  | 2.726 | 18.293 |
| 166 | 9.3    | 2.879 | 20.365 |
| 167 | 9.61   | 2.93  | 21.37  |
| 168 | 12.891 | 2.256 | 22.474 |
| 169 | 12.564 | 2.092 | 19.731 |
| 170 | 9.417  | 1.727 | 11.448 |
| 171 | 9.53   | 1.713 | 11.685 |
| 172 | 9.723  | 1.807 | 12.274 |
| 173 | 9.065  | 2.071 | 15.173 |
| 174 | 8.935  | 2.088 | 15.266 |
| 175 | 9.147  | 2.056 | 16.259 |
| 176 | 8.988  | 2.006 | 15.621 |
| 177 | 12.321 | 2.289 | 23.287 |
| 178 | 12.829 | 2.444 | 25.831 |
| 179 | 11.651 | 2.436 | 23.021 |
| 180 | 11.133 | 1.79  | 15.04  |
| 181 | 11.394 | 1.825 | 15.208 |
| 182 | 11.448 | 1.837 | 15.796 |
| 183 | 11.171 | 1.855 | 15.45  |
| 184 | 9.338  | 2.397 | 17.359 |
| 185 | 9.664  | 2.35  | 17.95  |
| 186 | 10.651 | 2.632 | 21.994 |
| 187 | 10.698 | 2.598 | 21.775 |
| 188 | 10.154 | 2.546 | 20.286 |
| 189 | 10.133 | 1.916 | 13.766 |
| 190 | 10.246 | 2.067 | 15.091 |

---

---

|     |        |       |        |
|-----|--------|-------|--------|
| 191 | 10.652 | 2.128 | 15.793 |
| 192 | 10.531 | 2.041 | 14.874 |
| 193 | 9.224  | 2.528 | 17.33  |
| 194 | 8.556  | 2.61  | 16.825 |
| 195 | 9.383  | 2.916 | 20.741 |
| 196 | 9.628  | 2.893 | 21.32  |
| 197 | 13.378 | 2.276 | 22.069 |
| 198 | 12.596 | 2.228 | 21.007 |
| 199 | 12.388 | 2.164 | 20.62  |
| 200 | 12.48  | 2.321 | 24.887 |
| 201 | 12.565 | 2.584 | 24.791 |
| 202 | 11.946 | 2.466 | 22.511 |
| 203 | 12.118 | 2.558 | 23.244 |
| 204 | 9.372  | 2.271 | 17.562 |
| 205 | 9.584  | 2.224 | 16.678 |
| 206 | 9.062  | 2.104 | 15.132 |
| 207 | 9.585  | 2.317 | 17.183 |
| 208 | 9.374  | 2.226 | 16.296 |
| 209 | 13.388 | 2.345 | 23.277 |
| 210 | 12.387 | 2.032 | 19.795 |
| 211 | 13.081 | 2.076 | 21.226 |
| 212 | 12.845 | 2.058 | 20.797 |
| 213 | 12.143 | 2.183 | 19.608 |
| 214 | 12.542 | 2.232 | 20.009 |
| 215 | 12.424 | 2.652 | 25.382 |
| 216 | 10.95  | 2.349 | 19.779 |
| 217 | 11.201 | 2.375 | 21.217 |
| 218 | 11.841 | 2.524 | 23.252 |
| 219 | 11.637 | 2.32  | 21.909 |
| 220 | 12.123 | 2.363 | 22.887 |
| 221 | 11.568 | 2.377 | 20.168 |
| 222 | 11.185 | 2.294 | 19.657 |
| 223 | 12.505 | 2.445 | 23.902 |
| 224 | 11.236 | 2.133 | 18.267 |
| 225 | 10.523 | 3.996 | 32.791 |
| 226 | 10.852 | 2.773 | 22.591 |
| 227 | 11.102 | 2.782 | 23.124 |
| 228 | 11.166 | 2.831 | 24.206 |
| 229 | 11.086 | 2.889 | 25.825 |
| 230 | 10.683 | 2.822 | 24.779 |
| 231 | 11.431 | 3.044 | 27.934 |
| 232 | 10.837 | 2.875 | 25.373 |
| 233 | 9.227  | 2.501 | 18.248 |
| 234 | 9.083  | 2.404 | 16.802 |
| 235 | 9.903  | 2.607 | 20.272 |
| 236 | 9.857  | 2.67  | 20.782 |
| 237 | 9.878  | 2.662 | 18.982 |
| 238 | 9.996  | 2.727 | 20.104 |

---

---

|     |        |       |        |
|-----|--------|-------|--------|
| 239 | 9.828  | 2.61  | 18.414 |
| 240 | 8.975  | 2.392 | 16.336 |
| 241 | 9.097  | 2.417 | 16.813 |
| 242 | 9.554  | 2.448 | 17.948 |
| 243 | 9.252  | 2.194 | 15.444 |
| 244 | 9.985  | 2.387 | 17.322 |
| 245 | 10.332 | 2.494 | 19.192 |
| 246 | 9.547  | 2.463 | 17.211 |
| 247 | 10.253 | 2.601 | 19.761 |
| 248 | 10.4   | 2.545 | 19.945 |
| 249 | 10.106 | 2.383 | 18.668 |
| 250 | 10.485 | 2.389 | 19.755 |
| 251 | 10.164 | 2.36  | 18.613 |
| 252 | 10.899 | 2.682 | 21.756 |
| 253 | 10.26  | 2.473 | 19.181 |
| 254 | 10.972 | 2.745 | 22.564 |
| 255 | 11.542 | 2.54  | 24.147 |
| 256 | 11.32  | 2.761 | 23.932 |
| 257 | 12.623 | 2.794 | 28.053 |
| 258 | 11.75  | 2.568 | 24.572 |
| 259 | 8.629  | 2.496 | 16.477 |
| 260 | 8.959  | 2.435 | 16.918 |
| 261 | 9.187  | 2.444 | 17.188 |
| 262 | 9.447  | 2.52  | 18.331 |
| 263 | 9.544  | 2.524 | 18.409 |
| 264 | 8.568  | 2.501 | 16.54  |
| 265 | 7.903  | 2.425 | 14.953 |
| 266 | 9.586  | 2.805 | 21.074 |
| 267 | 8.797  | 2.477 | 17.058 |
| 268 | 11.246 | 2.724 | 24.393 |
| 269 | 12.091 | 2.908 | 27.161 |
| 270 | 11.648 | 2.928 | 27.872 |
| 271 | 12.2   | 3.126 | 29.332 |
| 272 | 10.531 | 2.267 | 19.199 |
| 273 | 11.949 | 2.375 | 21.826 |
| 274 | 12.467 | 2.437 | 23.948 |
| 275 | 11.503 | 2.315 | 21.502 |
| 276 | 11.52  | 2.217 | 17.729 |
| 277 | 10.097 | 1.804 | 12.773 |
| 278 | 11.055 | 1.957 | 13.903 |
| 279 | 11.189 | 1.997 | 14.711 |
| 280 | 11.803 | 2.123 | 20.154 |
| 281 | 10.372 | 2.115 | 14.576 |
| 282 | 10.097 | 2.079 | 14.073 |
| 283 | 10.676 | 2.313 | 16.819 |
| 284 | 10.473 | 2.481 | 19.096 |
| 285 | 9.632  | 2.233 | 16.096 |
| 286 | 9.749  | 2.317 | 16.551 |

---

---

|     |        |       |        |
|-----|--------|-------|--------|
| 287 | 10.898 | 2.511 | 19.982 |
| 288 | 10.962 | 2.546 | 19.986 |
| 289 | 10.535 | 2.434 | 19.067 |
| 290 | 10.931 | 2.984 | 25.352 |
| 291 | 10.99  | 3.034 | 25.239 |
| 292 | 11.611 | 3.305 | 28.442 |
| 293 | 11.66  | 3.235 | 28.77  |
| 294 | 11.642 | 3.208 | 28.844 |
| 295 | 13.661 | 2.847 | 28     |
| 296 | 13.649 | 2.796 | 27.132 |
| 297 | 12.962 | 2.673 | 24.916 |
| 298 | 13.362 | 2.738 | 26.759 |
| 299 | 12.639 | 2.55  | 23.653 |
| 300 | 12.935 | 2.614 | 24.941 |
| 301 | 12.596 | 2.574 | 23.732 |
| 302 | 12.801 | 3.026 | 28.083 |
| 303 | 12.773 | 2.943 | 27.953 |
| 304 | 12.997 | 3.111 | 28.921 |
| 305 | 11.723 | 2.88  | 24.451 |
| 306 | 12.555 | 2.926 | 27.146 |
| 307 | 12.279 | 2.861 | 26.058 |
| 308 | 11.896 | 2.921 | 26.18  |
| 309 | 11.907 | 2.903 | 24.87  |
| 310 | 11.593 | 2.853 | 24.272 |
| 311 | 11.126 | 2.995 | 26.445 |
| 312 | 11.812 | 3.169 | 29.761 |
| 313 | 11.59  | 3.175 | 29.857 |
| 314 | 12.443 | 3.415 | 33.97  |
| 315 | 12.376 | 3.399 | 33.9   |
| 316 | 12.56  | 3.757 | 35.775 |
| 317 | 12.417 | 3.667 | 35.007 |
| 318 | 12.407 | 3.612 | 35.26  |
| 319 | 10.603 | 2.129 | 17.156 |
| 320 | 10.315 | 2.03  | 16.373 |
| 321 | 10.271 | 1.992 | 15.53  |
| 322 | 10.053 | 1.953 | 14.895 |
| 323 | 9.942  | 1.963 | 15.045 |
| 324 | 10.374 | 2.011 | 15.987 |
| 325 | 12.588 | 2.608 | 24.9   |
| 326 | 12.604 | 2.588 | 25.661 |
| 327 | 12.73  | 2.534 | 25.9   |
| 328 | 12.806 | 2.618 | 26.539 |
| 329 | 13.246 | 2.714 | 28.598 |
| 330 | 13.092 | 2.64  | 28.669 |
| 331 | 12.854 | 2.596 | 27.058 |
| 332 | 12.513 | 2.482 | 25.747 |
| 333 | 11.358 | 2.158 | 18.537 |
| 334 | 11.469 | 2.185 | 19.165 |

---

---

|     |        |       |        |
|-----|--------|-------|--------|
| 335 | 11.894 | 2.26  | 20.991 |
| 336 | 11.43  | 2.162 | 19.202 |
| 337 | 11.853 | 2.265 | 20.534 |
| 338 | 8.868  | 1.785 | 13.463 |
| 339 | 9.069  | 1.862 | 13.697 |
| 340 | 8.722  | 1.874 | 12.652 |
| 341 | 9.069  | 1.925 | 14.411 |
| 342 | 9.348  | 2.102 | 16.143 |
| 343 | 9.378  | 2.052 | 15.49  |
| 344 | 9.537  | 2.104 | 16.022 |
| 345 | 9.92   | 2.212 | 17.853 |
| 346 | 11.832 | 2.086 | 19.493 |
| 347 | 12.249 | 2.501 | 23.494 |
| 348 | 12.125 | 2.659 | 24.92  |
| 349 | 12.609 | 2.636 | 24.054 |
| 350 | 11.215 | 1.802 | 16.163 |
| 351 | 10.87  | 3.361 | 28.122 |
| 352 | 10.709 | 3.273 | 27.806 |
| 353 | 11.39  | 3.339 | 28.964 |
| 354 | 12.723 | 3.684 | 37.278 |
| 355 | 13.048 | 3.666 | 39.091 |
| 356 | 9.252  | 2.42  | 16.935 |
| 357 | 8.841  | 2.363 | 15.584 |
| 358 | 9.701  | 2.544 | 18.806 |
| 359 | 8.998  | 2.432 | 16.354 |
| 360 | 8.551  | 2.023 | 13.289 |
| 361 | 8.707  | 2.031 | 13.569 |
| 362 | 8.618  | 2.015 | 13.407 |
| 363 | 8.723  | 2.051 | 13.697 |
| 364 | 10.324 | 2.641 | 21.695 |
| 365 | 9.633  | 2.417 | 18.642 |
| 366 | 9.723  | 2.447 | 18.585 |
| 367 | 9.792  | 2.425 | 18.675 |
| 368 | 10.256 | 2.577 | 20.953 |
| 369 | 9.411  | 2.397 | 17.497 |
| 370 | 9.78   | 2.508 | 18.53  |
| 371 | 9.388  | 2.43  | 16.683 |
| 372 | 9.252  | 2.389 | 16.684 |
| 373 | 10.133 | 2.544 | 19.766 |
| 374 | 11.381 | 2.86  | 25.925 |
| 375 | 12.011 | 3.133 | 27.88  |
| 376 | 12.389 | 3.214 | 29.543 |
| 377 | 12.173 | 3.151 | 27.877 |
| 378 | 12.415 | 3.212 | 29.94  |
| 379 | 8.987  | 2.386 | 16.42  |
| 380 | 9.146  | 2.471 | 17.577 |
| 381 | 8.992  | 2.419 | 16.796 |
| 382 | 10.261 | 2.644 | 21.1   |

---



---

|     |        |       |        |
|-----|--------|-------|--------|
| 383 | 11.917 | 2.893 | 26.763 |
| 384 | 10.634 | 2.679 | 21.905 |
| 385 | 10.822 | 2.699 | 22.142 |
| 386 | 10.833 | 2.68  | 21.884 |
| 387 | 11.064 | 2.767 | 23.753 |
| 388 | 11.113 | 2.861 | 25.669 |
| 389 | 10.65  | 2.811 | 24.281 |
| 390 | 10.904 | 2.971 | 26.398 |
| 391 | 11.554 | 3.047 | 28.622 |
| 392 | 9.82   | 2.6   | 19.788 |
| 393 | 11.118 | 2.094 | 18.862 |
| 394 | 12.115 | 2.184 | 21.448 |
| 395 | 11.913 | 2.115 | 18.715 |
| 396 | 12.031 | 2.169 | 19.265 |
| 397 | 12.709 | 2.131 | 19.524 |
| 398 | 12.92  | 2.293 | 21.035 |
| 399 | 9.727  | 1.834 | 12.503 |
| 400 | 9.955  | 1.809 | 12.761 |
| 401 | 9.581  | 1.715 | 11.68  |
| 402 | 10.809 | 1.715 | 13.88  |
| 403 | 10.465 | 1.714 | 12.934 |
| 404 | 10.192 | 1.638 | 12.406 |
| 405 | 10.262 | 1.62  | 12.735 |
| 406 | 11.356 | 1.837 | 16.364 |
| 407 | 10.609 | 1.709 | 14.341 |
| 408 | 10.163 | 1.661 | 13.043 |
| 409 | 11.43  | 3.098 | 26.038 |
| 410 | 12.025 | 3.079 | 29.175 |
| 411 | 11.21  | 2.935 | 25.29  |
| 412 | 11.731 | 3.121 | 27.786 |
| 413 | 11.42  | 3.059 | 26.638 |
| 414 | 11.587 | 3.033 | 26.26  |
| 415 | 11.358 | 2.63  | 21.587 |
| 416 | 10.373 | 2.336 | 17.826 |
| 417 | 9.753  | 2.321 | 16.192 |
| 418 | 10.16  | 2.34  | 17.708 |
| 419 | 11.3   | 2.549 | 20.77  |
| 420 | 11.375 | 2.603 | 21.4   |
| 421 | 10.232 | 2.33  | 16.655 |
| 422 | 10.511 | 2.372 | 17.476 |
| 423 | 10.006 | 2.202 | 17.362 |
| 424 | 10.175 | 2.285 | 18.538 |
| 425 | 10.854 | 2.23  | 19.215 |
| 426 | 10.758 | 2.16  | 19.366 |
| 427 | 10.856 | 2.242 | 19.775 |
| 428 | 10.909 | 2.069 | 19.167 |
| 429 | 11.069 | 2.19  | 19.352 |
| 430 | 12.042 | 2.536 | 23.475 |

---

---

|     |        |       |        |
|-----|--------|-------|--------|
| 431 | 11.697 | 2.529 | 22.189 |
| 432 | 12.367 | 2.669 | 24.643 |
| 433 | 11.847 | 2.531 | 22.773 |
| 434 | 12.098 | 2.606 | 23.344 |
| 435 | 12.235 | 2.583 | 24.241 |
| 436 | 12.242 | 2.648 | 25.662 |
| 437 | 12.457 | 2.599 | 26.366 |
| 438 | 12.166 | 2.536 | 25.258 |
| 439 | 12.267 | 2.56  | 25.053 |
| 440 | 12.087 | 2.515 | 24.833 |
| 441 | 12.268 | 2.461 | 25.423 |
| 442 | 12.011 | 2.524 | 21.948 |
| 443 | 11.924 | 2.498 | 20.841 |
| 444 | 12.086 | 2.533 | 21.893 |
| 445 | 12.614 | 2.725 | 24.19  |
| 446 | 12.785 | 2.717 | 24.538 |
| 447 | 12.701 | 2.609 | 24.022 |
| 448 | 12.251 | 2.555 | 22.126 |
| 449 | 10.039 | 1.632 | 13.022 |
| 450 | 9.888  | 1.59  | 12.734 |
| 451 | 9.924  | 1.627 | 13.137 |
| 452 | 10.84  | 1.812 | 15.188 |
| 453 | 10.795 | 1.743 | 15.212 |
| 454 | 10.572 | 1.775 | 14.892 |
| 455 | 10.212 | 1.687 | 13.718 |
| 456 | 10.529 | 1.767 | 14.797 |
| 457 | 12.052 | 2.484 | 22.994 |
| 458 | 12.12  | 2.551 | 23.796 |
| 459 | 12.141 | 2.53  | 24.863 |
| 460 | 11.943 | 2.446 | 24.18  |
| 461 | 11.125 | 2.611 | 22.25  |
| 462 | 12.225 | 2.927 | 27.822 |
| 463 | 12.535 | 2.933 | 28.461 |
| 464 | 12.876 | 3.03  | 30.223 |
| 465 | 13.085 | 3.061 | 31.423 |
| 466 | 13.152 | 3.076 | 31.649 |
| 467 | 12.911 | 2.966 | 30.854 |
| 468 | 13.616 | 3.146 | 34.17  |
| 469 | 12.703 | 2.945 | 29.737 |
| 470 | 10.711 | 2.901 | 23.865 |
| 471 | 10.826 | 3.019 | 24.56  |
| 472 | 10.588 | 2.857 | 23.025 |
| 473 | 10.446 | 2.849 | 22.572 |
| 474 | 10.641 | 2.874 | 23.297 |
| 475 | 10.835 | 2.987 | 24.032 |
| 476 | 11.178 | 3.101 | 26.636 |
| 477 | 11.379 | 3.203 | 27.974 |
| 478 | 12.634 | 2.61  | 23.907 |

---

---

|     |        |       |        |
|-----|--------|-------|--------|
| 479 | 12.535 | 2.545 | 23.778 |
| 480 | 12.834 | 2.704 | 24.428 |
| 481 | 13.38  | 2.716 | 26.777 |
| 482 | 11.268 | 2.478 | 22.12  |
| 483 | 10.999 | 2.484 | 20.876 |
| 484 | 11.359 | 2.454 | 22.174 |
| 485 | 11.591 | 2.48  | 22.566 |
| 486 | 11.346 | 2.493 | 21.876 |
| 487 | 11.794 | 2.485 | 23.213 |
| 488 | 9.037  | 1.83  | 13.179 |
| 489 | 8.559  | 1.825 | 12.66  |
| 490 | 8.964  | 1.856 | 13.497 |
| 491 | 9.063  | 1.815 | 13.137 |
| 492 | 9.281  | 1.811 | 13.205 |
| 493 | 9.089  | 1.842 | 13.287 |
| 494 | 8.985  | 1.798 | 12.292 |
| 495 | 9.014  | 1.78  | 12.412 |
| 496 | 8.79   | 1.803 | 11.996 |
| 497 | 9.149  | 1.949 | 13.557 |
| 498 | 9.121  | 1.948 | 13.368 |
| 499 | 9.168  | 1.944 | 14.056 |
| 500 | 9      | 1.861 | 12.99  |
| 501 | 9.862  | 1.585 | 11.805 |
| 502 | 10.178 | 1.725 | 12.531 |
| 503 | 9.621  | 1.547 | 11.072 |
| 504 | 10.057 | 1.66  | 12.294 |
| 505 | 10.506 | 1.689 | 12.925 |
| 506 | 8.169  | 2.194 | 13.661 |
| 507 | 8.294  | 2.234 | 14.438 |
| 508 | 8.087  | 2.06  | 13.114 |
| 509 | 8.169  | 2.109 | 13.527 |
| 510 | 8.136  | 2.144 | 13.488 |
| 511 | 8.313  | 2.185 | 14.564 |
| 512 | 8.275  | 2.274 | 14.004 |
| 513 | 9.499  | 1.802 | 13.219 |
| 514 | 9.5    | 1.707 | 12.457 |
| 515 | 10.155 | 1.791 | 14.462 |
| 516 | 9.926  | 1.675 | 13.716 |
| 517 | 9.963  | 1.811 | 13.981 |
| 518 | 10.233 | 1.795 | 14.853 |
| 519 | 10.466 | 1.862 | 15.531 |
| 520 | 10.213 | 1.771 | 14.964 |
| 521 | 10.145 | 1.818 | 14.522 |
| 522 | 10.802 | 1.705 | 13.387 |
| 523 | 11.2   | 1.682 | 14.297 |
| 524 | 10.836 | 1.657 | 13.629 |
| 525 | 11.314 | 1.726 | 14.111 |
| 526 | 11.073 | 1.754 | 13.994 |

---

---

|     |        |       |        |
|-----|--------|-------|--------|
| 527 | 11.233 | 1.735 | 14.305 |
| 528 | 11.437 | 1.692 | 13.573 |
| 529 | 13.261 | 2.27  | 22.189 |
| 530 | 12.09  | 2.097 | 20.062 |
| 531 | 12.843 | 2.105 | 22.453 |
| 532 | 13.307 | 2.255 | 25.249 |
| 533 | 12.335 | 2.513 | 25.727 |
| 534 | 12.381 | 2.559 | 26.147 |
| 535 | 12.21  | 2.442 | 24.612 |
| 536 | 12.379 | 2.598 | 25.217 |
| 537 | 12.708 | 2.585 | 27.528 |
| 538 | 12.295 | 2.514 | 26.233 |
| 539 | 12.444 | 2.53  | 25.846 |
| 540 | 12.304 | 2.48  | 25.915 |
| 541 | 12.162 | 2.499 | 25.029 |
| 542 | 12.139 | 2.519 | 24.474 |
| 543 | 12.314 | 2.57  | 25.093 |
| 544 | 11.62  | 2.418 | 22.695 |
| 545 | 11.444 | 2.37  | 22.188 |
| 546 | 8.846  | 1.893 | 12.835 |
| 547 | 8.475  | 1.823 | 12.155 |
| 548 | 10.067 | 1.58  | 11.21  |
| 549 | 8.977  | 1.485 | 10.364 |
| 550 | 8.971  | 1.604 | 10.37  |
| 551 | 8.457  | 1.424 | 9.304  |
| 552 | 8.563  | 1.455 | 9.319  |
| 553 | 9.085  | 1.616 | 10.923 |
| 554 | 8.871  | 1.448 | 9.681  |
| 555 | 10.293 | 1.554 | 11.915 |
| 556 | 9.525  | 1.531 | 11.084 |
| 557 | 9.647  | 1.565 | 11.228 |
| 558 | 9.839  | 1.558 | 11.492 |
| 559 | 10.076 | 1.619 | 12.099 |
| 560 | 9.948  | 1.589 | 11.676 |
| 561 | 9.429  | 1.661 | 13.035 |
| 562 | 9.256  | 1.739 | 12.974 |
| 563 | 9.166  | 1.709 | 13.176 |
| 564 | 9.765  | 1.733 | 14.055 |
| 565 | 9.516  | 1.728 | 13.436 |
| 566 | 8.45   | 2.127 | 13.999 |
| 567 | 8.464  | 2.059 | 13.944 |
| 568 | 8.897  | 2.137 | 15.608 |
| 569 | 8.923  | 2.184 | 15.885 |
| 570 | 8.894  | 2.136 | 16.037 |
| 571 | 9.098  | 2.145 | 15.815 |
| 572 | 8.194  | 2.136 | 14.318 |
| 573 | 8.68   | 2.327 | 16.073 |
| 574 | 8.695  | 2.203 | 15.896 |

---

---

|     |        |       |        |
|-----|--------|-------|--------|
| 575 | 8.63   | 2.217 | 15.782 |
| 576 | 8.496  | 2.314 | 15.933 |
| 577 | 8.557  | 2.257 | 15.649 |
| 578 | 9.089  | 2.378 | 17.126 |
| 579 | 9.303  | 2.415 | 17.842 |
| 580 | 9.267  | 2.452 | 18.162 |
| 581 | 9.089  | 2.402 | 16.998 |
| 582 | 9.765  | 2.577 | 19.572 |
| 583 | 9.601  | 2.501 | 18.817 |
| 584 | 11.183 | 1.868 | 16.549 |
| 585 | 12.684 | 2.043 | 20.795 |
| 586 | 12.024 | 2.171 | 20.163 |
| 587 | 12.443 | 2.182 | 21.652 |
| 588 | 12.708 | 2.195 | 21.849 |
| 589 | 12.308 | 2.067 | 20.016 |
| 590 | 9.818  | 2.073 | 15.722 |
| 591 | 9.854  | 2.041 | 15.855 |
| 592 | 10.106 | 2.177 | 17.402 |
| 593 | 10.07  | 2.171 | 17.12  |
| 594 | 9.889  | 2.199 | 16.581 |
| 595 | 10.006 | 2.204 | 16.922 |
| 596 | 10.026 | 2.175 | 16.865 |
| 597 | 10.723 | 2.13  | 17.411 |
| 598 | 10.861 | 2.074 | 17.17  |
| 599 | 10.939 | 2.092 | 17.509 |
| 600 | 11.504 | 1.82  | 15.801 |
| 601 | 11.197 | 2.645 | 22.299 |
| 602 | 11.833 | 2.681 | 24.915 |
| 603 | 11.961 | 2.779 | 25.846 |
| 604 | 11.667 | 2.816 | 26.081 |
| 605 | 11.592 | 2.697 | 24.787 |
| 606 | 11.944 | 2.781 | 26.266 |
| 607 | 12.551 | 2.966 | 28.407 |
| 608 | 12.179 | 2.857 | 27.077 |
| 609 | 11.928 | 2.81  | 25.891 |
| 610 | 11.186 | 2.39  | 20.96  |
| 611 | 11.63  | 2.463 | 22.277 |
| 612 | 11.434 | 2.43  | 21.743 |
| 613 | 12     | 2.547 | 23.897 |
| 614 | 11.592 | 2.483 | 23.138 |
| 615 | 11.25  | 2.359 | 22.286 |
| 616 | 11.387 | 2.508 | 22.712 |
| 617 | 11.463 | 2.49  | 22.525 |
| 618 | 11.273 | 2.412 | 21.419 |
| 619 | 9.275  | 1.534 | 10.579 |
| 620 | 9.578  | 1.369 | 10.778 |
| 621 | 10.579 | 1.727 | 13.297 |
| 622 | 10.917 | 1.713 | 14.116 |

---

---

|     |        |       |        |
|-----|--------|-------|--------|
| 623 | 10.239 | 1.599 | 12.892 |
| 624 | 11.372 | 1.798 | 15.361 |
| 625 | 9.538  | 2.085 | 14.585 |
| 626 | 9.529  | 2.053 | 14.937 |
| 627 | 9.346  | 2.117 | 14.603 |
| 628 | 9.364  | 2.057 | 14.317 |
| 629 | 9.438  | 2.022 | 14.776 |
| 630 | 9.601  | 2.105 | 15.088 |
| 631 | 12.865 | 2.365 | 23.661 |
| 632 | 12.658 | 2.215 | 20.997 |
| 633 | 12.015 | 2.095 | 19.264 |
| 634 | 12.881 | 2.294 | 21.801 |
| 635 | 9.062  | 2.83  | 19.545 |
| 636 | 9.096  | 2.729 | 19.149 |
| 637 | 10.157 | 2.996 | 22.629 |
| 638 | 10.122 | 2.953 | 22.253 |
| 639 | 10.8   | 2.332 | 20.083 |
| 640 | 10.785 | 2.376 | 20.201 |
| 641 | 11.159 | 2.493 | 21.788 |
| 642 | 10.8   | 2.447 | 20.345 |
| 643 | 10.318 | 1.932 | 16.485 |
| 644 | 10.223 | 1.99  | 15.344 |
| 645 | 10.539 | 2.039 | 16.834 |
| 646 | 10.578 | 1.955 | 16.405 |
| 647 | 11.559 | 2.107 | 18.355 |
| 648 | 11.995 | 2.166 | 18.989 |
| 649 | 11.433 | 2.057 | 17.908 |
| 650 | 11.417 | 2.079 | 16.432 |
| 651 | 11.38  | 2.106 | 15.573 |
| 652 | 11.027 | 2.49  | 19.653 |
| 653 | 11.022 | 2.46  | 18.933 |
| 654 | 11.284 | 2.433 | 20.013 |
| 655 | 12.214 | 2.552 | 23.564 |
| 656 | 10.096 | 2.522 | 19.836 |
| 657 | 9.788  | 2.497 | 19.153 |
| 658 | 9.52   | 2.399 | 18.45  |
| 659 | 9.968  | 2.449 | 19.295 |
| 660 | 10.58  | 2.571 | 21.847 |
| 661 | 13.924 | 2.348 | 25.084 |
| 662 | 13.373 | 2.217 | 23.327 |
| 663 | 12.912 | 2.245 | 21.746 |
| 664 | 13.615 | 2.347 | 24.827 |
| 665 | 14.231 | 2.478 | 26.821 |
| 666 | 13.82  | 2.375 | 25.296 |
| 667 | 13.29  | 2.417 | 25.074 |
| 668 | 13.32  | 2.44  | 25.841 |
| 669 | 13.46  | 2.4   | 25.548 |
| 670 | 9.813  | 1.921 | 12.797 |

---

---

|     |        |       |        |
|-----|--------|-------|--------|
| 671 | 9.259  | 1.836 | 11.916 |
| 672 | 9.767  | 2.081 | 13.434 |
| 673 | 9.783  | 2.249 | 16.224 |
| 674 | 9.811  | 2.355 | 16.296 |
| 675 | 9.829  | 2.333 | 16.416 |
| 676 | 10.849 | 2.462 | 19.742 |
| 677 | 10.104 | 2.315 | 17.246 |
| 678 | 10.067 | 2.416 | 17.728 |
| 679 | 9.996  | 2.439 | 19.429 |
| 680 | 9.989  | 2.627 | 19.872 |
| 681 | 10.066 | 2.566 | 19.445 |
| 682 | 10.574 | 2.287 | 16.579 |
| 683 | 10.213 | 2.307 | 15.547 |
| 684 | 10.676 | 2.345 | 16.515 |
| 685 | 10.155 | 2.277 | 14.942 |
| 686 | 10.16  | 2.338 | 17.763 |
| 687 | 10.44  | 2.425 | 18.922 |
| 688 | 10.314 | 2.344 | 17.892 |
| 689 | 10.358 | 2.432 | 18.156 |
| 690 | 11.396 | 3.014 | 27.664 |
| 691 | 10.821 | 2.931 | 24.896 |
| 692 | 10.548 | 2.781 | 23.346 |
| 693 | 10.51  | 2.875 | 23.13  |
| 694 | 9.838  | 2.919 | 22.963 |
| 695 | 10.413 | 2.863 | 23.094 |
| 696 | 10.571 | 2.959 | 24.118 |
| 697 | 10.758 | 3.012 | 24.859 |
| 698 | 10.174 | 2.977 | 22.525 |
| 699 | 9.749  | 2.862 | 21.02  |
| 700 | 10.453 | 3.264 | 24.898 |
| 701 | 10.175 | 3.139 | 23.76  |
| 702 | 9.004  | 2.698 | 19.425 |
| 703 | 9.166  | 2.831 | 20.292 |
| 704 | 9.562  | 2.884 | 21.705 |
| 705 | 10.312 | 2.99  | 22.884 |
| 706 | 9.587  | 2.648 | 19.107 |
| 707 | 9.526  | 2.678 | 19.111 |
| 708 | 9.803  | 2.715 | 20.439 |
| 709 | 9.754  | 2.775 | 19.884 |
| 710 | 9.897  | 2.991 | 22.584 |
| 711 | 9.78   | 3.04  | 22.603 |
| 712 | 10.223 | 2.974 | 23.262 |
| 713 | 9.845  | 2.903 | 22.362 |
| 714 | 7.573  | 2.454 | 13.793 |
| 715 | 7.445  | 2.359 | 13.181 |
| 716 | 7.897  | 2.5   | 14.818 |
| 717 | 7.967  | 2.561 | 15.021 |
| 718 | 8.874  | 2.608 | 18.206 |

---

---

|     |        |       |        |
|-----|--------|-------|--------|
| 719 | 8.538  | 2.559 | 17.018 |
| 720 | 7.826  | 2.317 | 14.433 |
| 721 | 7.55   | 2.251 | 13.555 |
| 722 | 8.495  | 2.494 | 16.677 |
| 723 | 8.393  | 2.408 | 15.778 |
| 724 | 8.455  | 2.388 | 15.936 |
| 725 | 10.592 | 2.595 | 21.455 |
| 726 | 12.532 | 3.065 | 29.655 |
| 727 | 11.298 | 2.876 | 26.123 |
| 728 | 11.994 | 3.041 | 28.4   |
| 729 | 10.014 | 2.095 | 17.235 |
| 730 | 11.176 | 2.262 | 19.339 |
| 731 | 12.17  | 2.34  | 22.713 |
| 732 | 11.057 | 2.274 | 19.684 |
| 733 | 8.964  | 1.647 | 10.849 |
| 734 | 9.224  | 1.694 | 11.009 |
| 735 | 10.637 | 1.841 | 13.211 |
| 736 | 9.839  | 1.672 | 11.356 |
| 737 | 11.58  | 2.05  | 19.305 |
| 738 | 10.038 | 2.09  | 14.159 |
| 739 | 9.896  | 2.647 | 18.65  |
| 740 | 9.085  | 2.454 | 16.917 |
| 741 | 9.261  | 2.446 | 17.377 |
| 742 | 9.419  | 2.466 | 17.549 |
| 743 | 8.917  | 2.181 | 14.798 |
| 744 | 9.232  | 2.211 | 15.315 |
| 745 | 9.643  | 2.274 | 16.629 |
| 746 | 9.772  | 2.288 | 16.922 |
| 747 | 9.947  | 2.518 | 18.029 |
| 748 | 9.48   | 2.453 | 17.308 |
| 749 | 9.614  | 2.426 | 17.478 |
| 750 | 10.156 | 2.387 | 18.898 |
| 751 | 10.155 | 2.386 | 18.95  |
| 752 | 9.665  | 2.234 | 16.932 |
| 753 | 9.896  | 2.349 | 17.705 |
| 754 | 10.47  | 2.437 | 20.05  |
| 755 | 11.144 | 2.708 | 22.476 |
| 756 | 10.628 | 2.589 | 20.811 |
| 757 | 10.637 | 2.634 | 21.021 |
| 758 | 10.795 | 2.677 | 22.011 |
| 759 | 10.67  | 2.424 | 21.424 |
| 760 | 8.845  | 2.346 | 15.257 |
| 761 | 8.159  | 2.171 | 13.273 |
| 762 | 9.098  | 2.42  | 16.387 |
| 763 | 8.874  | 2.348 | 15.56  |
| 764 | 8.45   | 1.978 | 12.948 |
| 765 | 8.687  | 2.035 | 13.851 |
| 766 | 8.76   | 2.036 | 13.916 |

---



---

|     |        |       |        |
|-----|--------|-------|--------|
| 767 | 8.742  | 2.005 | 13.492 |
| 768 | 9.336  | 2.377 | 17.578 |
| 769 | 9.447  | 2.454 | 18.203 |
| 770 | 9.218  | 2.395 | 17.495 |
| 771 | 9.699  | 2.442 | 18.737 |
| 772 | 9.823  | 2.471 | 19.953 |
| 773 | 8.64   | 2.204 | 14.277 |
| 774 | 9.031  | 2.336 | 15.98  |
| 775 | 9.629  | 2.504 | 18.038 |
| 776 | 9.471  | 2.435 | 17.495 |
| 777 | 11.181 | 2.756 | 24.913 |
| 778 | 12.152 | 3.13  | 28.39  |
| 779 | 12.074 | 3.085 | 27.935 |
| 780 | 11.719 | 3.063 | 26.414 |
| 781 | 11.93  | 3.051 | 27.32  |
| 782 | 9.025  | 2.454 | 16.624 |
| 783 | 9.085  | 2.446 | 17.083 |
| 784 | 10.036 | 2.546 | 20.364 |
| 785 | 11.946 | 2.904 | 26.752 |
| 786 | 10.468 | 2.634 | 21.393 |
| 787 | 10.528 | 2.634 | 20.918 |
| 788 | 11.054 | 2.713 | 22.616 |
| 789 | 10.799 | 2.694 | 22.808 |
| 790 | 10.626 | 2.774 | 23.75  |
| 791 | 10.536 | 2.803 | 24.116 |
| 792 | 10.578 | 2.803 | 24.339 |
| 793 | 10.898 | 2.831 | 25.844 |
| 794 | 8.575  | 2.271 | 15.782 |
| 795 | 9.724  | 2.596 | 19.918 |
| 796 | 9.408  | 2.531 | 18.025 |
| 797 | 9.671  | 2.516 | 18.942 |
| 798 | 9.688  | 2.576 | 19.835 |
| 799 | 10.029 | 2.756 | 20.456 |
| 800 | 10.371 | 2.04  | 14.98  |
| 801 | 10.154 | 1.95  | 13.966 |
| 802 | 8.73   | 2.424 | 15.616 |
| 803 | 8.707  | 2.656 | 17.753 |
| 804 | 9.38   | 2.861 | 20.847 |
| 805 | 9.865  | 3.008 | 22.469 |
| 806 | 12.489 | 2.22  | 19.871 |
| 807 | 12.918 | 2.303 | 21.824 |
| 808 | 12.481 | 2.213 | 20.342 |
| 809 | 12.756 | 2.357 | 21.689 |
| 810 | 10.973 | 2.083 | 19.249 |
| 811 | 11.86  | 2.433 | 21.759 |
| 812 | 12.259 | 2.589 | 23.454 |
| 813 | 12.054 | 2.498 | 22.571 |
| 814 | 9.324  | 2.383 | 16.839 |

---

---

|     |        |       |        |
|-----|--------|-------|--------|
| 815 | 8.84   | 2.031 | 13.898 |
| 816 | 9.006  | 2.133 | 14.994 |
| 817 | 9.12   | 2.174 | 15.451 |
| 818 | 9.162  | 2.176 | 15.455 |
| 819 | 12.051 | 2.133 | 18.93  |
| 820 | 12.168 | 2.079 | 18.804 |
| 821 | 12.778 | 2.093 | 20.168 |
| 822 | 12.955 | 2.354 | 21.887 |
| 823 | 11.781 | 2.188 | 18.523 |
| 824 | 13.344 | 2.353 | 22.605 |
| 825 | 10.227 | 2.205 | 17.506 |
| 826 | 10.283 | 2.066 | 17.09  |
| 827 | 10.903 | 2.329 | 19.975 |
| 828 | 10.982 | 2.267 | 19.62  |
| 829 | 11.919 | 2.341 | 22.665 |
| 830 | 11.912 | 2.257 | 21.956 |
| 831 | 11.305 | 2.314 | 19.731 |
| 832 | 10.22  | 2.098 | 16.757 |
| 833 | 11.156 | 2.222 | 19.208 |
| 834 | 11.26  | 2.268 | 19.063 |
| 835 | 10.384 | 1.935 | 15.89  |
| 836 | 9.046  | 3.44  | 24.269 |
| 837 | 9.635  | 3.36  | 25.643 |
| 838 | 9.941  | 3.519 | 27.742 |
| 839 | 10.048 | 3.383 | 26.571 |
| 840 | 10.375 | 3.496 | 28.105 |
| 841 | 11.207 | 3.504 | 32.114 |
| 842 | 11.071 | 3.349 | 30.29  |
| 843 | 10.909 | 3.222 | 29.356 |
| 844 | 10.377 | 3.176 | 25.41  |
| 845 | 10.1   | 3.036 | 24.03  |
| 846 | 10.707 | 3.264 | 27.319 |
| 847 | 10.779 | 3.226 | 26.785 |
| 848 | 13.202 | 3.881 | 42.625 |
| 849 | 12.158 | 3.593 | 36.628 |
| 850 | 10.49  | 1.874 | 15.121 |
| 851 | 11.299 | 2.116 | 18.331 |
| 852 | 10.939 | 1.918 | 16.587 |
| 853 | 10.465 | 2.654 | 21.473 |
| 854 | 10.403 | 2.517 | 20.013 |
| 855 | 10.479 | 2.512 | 20.416 |
| 856 | 10.644 | 2.695 | 20.92  |
| 857 | 10.397 | 2.611 | 20.364 |
| 858 | 11.396 | 1.654 | 16.224 |
| 859 | 12.001 | 1.814 | 18.412 |
| 860 | 12.5   | 2.133 | 21.798 |
| 861 | 12.189 | 1.905 | 19.034 |
| 862 | 10.203 | 1.889 | 14.545 |

---

---

|     |        |       |        |
|-----|--------|-------|--------|
| 863 | 10.433 | 1.874 | 15.255 |
| 864 | 10.476 | 1.845 | 14.749 |
| 865 | 10.569 | 1.819 | 14.868 |
| 866 | 10.513 | 1.872 | 14.719 |
| 867 | 9.923  | 1.596 | 12.215 |
| 868 | 10.281 | 1.6   | 13.314 |
| 869 | 10.28  | 1.646 | 13.124 |
| 870 | 9.926  | 1.949 | 15.875 |
| 871 | 10.774 | 2.03  | 18.021 |
| 872 | 10.911 | 2.084 | 18.254 |
| 873 | 10.789 | 2.06  | 18.033 |
| 874 | 11.88  | 2.126 | 20.499 |
| 875 | 12.139 | 2.159 | 19.074 |
| 876 | 12.451 | 2.21  | 20.092 |
| 877 | 12.869 | 2.166 | 19.491 |
| 878 | 12.81  | 2.146 | 19.925 |
| 879 | 12.609 | 2.118 | 19.409 |
| 880 | 9.636  | 1.777 | 12.44  |
| 881 | 9.373  | 1.72  | 11.373 |
| 882 | 9.095  | 1.622 | 10.568 |
| 883 | 9.436  | 1.738 | 12.092 |
| 884 | 8.818  | 1.973 | 14.008 |
| 885 | 8.812  | 2.006 | 15.149 |
| 886 | 9.692  | 2.19  | 18.035 |
| 887 | 9.29   | 1.964 | 16.82  |
| 888 | 12.479 | 2.278 | 23.945 |
| 889 | 12.233 | 2.193 | 23.559 |
| 890 | 11.136 | 2.347 | 21.42  |
| 891 | 10.926 | 1.774 | 14.552 |
| 892 | 11.352 | 1.808 | 15.279 |
| 893 | 11.387 | 1.868 | 15.654 |
| 894 | 10.479 | 1.807 | 13.546 |
| 895 | 8.802  | 2.245 | 15.752 |
| 896 | 9.06   | 2.276 | 16.047 |
| 897 | 10.602 | 2.653 | 21.598 |
| 898 | 10.602 | 2.573 | 21.407 |
| 899 | 10.185 | 2.523 | 20.262 |
| 900 | 12.257 | 2.595 | 26.362 |
| 901 | 10.477 | 2.317 | 19.541 |
| 902 | 11.204 | 2.483 | 21.689 |
| 903 | 12.491 | 2.398 | 23.887 |
| 904 | 12.59  | 2.419 | 24.624 |
| 905 | 12.517 | 2.343 | 23.742 |
| 906 | 12.659 | 2.213 | 22.722 |
| 907 | 10.203 | 1.882 | 16.494 |
| 908 | 10.938 | 1.955 | 19.253 |
| 909 | 10.891 | 2.037 | 18.596 |
| 910 | 11.961 | 2.428 | 23.93  |

---

---

|     |        |       |        |
|-----|--------|-------|--------|
| 911 | 10.189 | 2.927 | 23.935 |
| 912 | 12.342 | 2.356 | 23.125 |
| 913 | 11.301 | 3.274 | 28.324 |
| 914 | 10.887 | 3.19  | 27.676 |
| 915 | 12.328 | 3.539 | 34.071 |
| 916 | 7.746  | 2.497 | 15.591 |
| 917 | 7.717  | 2.544 | 15.215 |
| 918 | 11.64  | 2.405 | 22.054 |
| 919 | 8.132  | 2.286 | 14.527 |
| 920 | 10.955 | 3.018 | 24.98  |
| 921 | 10.815 | 2.996 | 24.562 |
| 922 | 9.741  | 2.663 | 19.876 |
| 923 | 10.629 | 2.923 | 23.785 |
| 924 | 9.614  | 2.486 | 18.641 |
| 925 | 9.369  | 2.628 | 18.538 |
| 926 | 10.097 | 2.561 | 19.062 |
| 927 | 9.064  | 2.706 | 18.35  |
| 928 | 8.274  | 2.439 | 15.436 |
| 929 | 7.371  | 2.146 | 12.262 |
| 930 | 10.05  | 2.512 | 18.42  |
| 931 | 10.738 | 2.708 | 22.024 |
| 932 | 9.852  | 2.542 | 18.243 |
| 933 | 10.304 | 2.7   | 21.408 |
| 934 | 12.288 | 2.924 | 26.867 |
| 935 | 9.328  | 2.347 | 15.827 |
| 936 | 9.474  | 2.791 | 19.31  |
| 937 | 9.213  | 2.637 | 17.375 |
| 938 | 9.103  | 2.546 | 15.557 |
| 939 | 12.643 | 3.463 | 32.072 |
| 940 | 10.397 | 2.487 | 21.434 |
| 941 | 10.557 | 2.697 | 21.349 |
| 942 | 11.13  | 2.678 | 22.517 |
| 943 | 9.824  | 2.773 | 21.455 |
| 944 | 9.449  | 2.67  | 19.512 |
| 945 | 10.217 | 2.928 | 23.533 |
| 946 | 9.044  | 2.343 | 15.74  |
| 947 | 9.84   | 2.442 | 17.958 |
| 948 | 11.842 | 2.811 | 26.006 |
| 949 | 9.224  | 2.364 | 15.997 |
| 950 | 10.006 | 2.749 | 21.853 |
| 951 | 10.096 | 2.682 | 22.018 |
| 952 | 10.209 | 2.853 | 23.039 |
| 953 | 9.814  | 2.584 | 20.331 |
| 954 | 10.278 | 2.823 | 23.011 |
| 955 | 9.005  | 2.385 | 16.737 |
| 956 | 10.59  | 2.616 | 20.403 |
| 957 | 8.561  | 1.777 | 12.543 |
| 958 | 9.72   | 2.763 | 20.604 |

---

---

|      |        |       |        |
|------|--------|-------|--------|
| 959  | 7.471  | 1.742 | 9.931  |
| 960  | 8.494  | 1.896 | 12.417 |
| 961  | 8.029  | 1.786 | 10.945 |
| 962  | 8.837  | 1.824 | 11.71  |
| 963  | 7.939  | 1.717 | 11.056 |
| 964  | 9.283  | 2.437 | 17.307 |
| 965  | 9.474  | 1.895 | 14.478 |
| 966  | 8.438  | 1.86  | 12.701 |
| 967  | 8.26   | 1.332 | 8.393  |
| 968  | 8.797  | 1.511 | 10.291 |
| 969  | 9.637  | 1.443 | 11.721 |
| 970  | 8.634  | 1.32  | 9.87   |
| 971  | 8.594  | 1.75  | 12.3   |
| 972  | 7.802  | 1.592 | 10.542 |
| 973  | 8.049  | 1.817 | 11.47  |
| 974  | 8.636  | 1.687 | 10.222 |
| 975  | 7.075  | 1.778 | 9.928  |
| 976  | 7.282  | 1.837 | 10.243 |
| 977  | 8.513  | 2.032 | 13.837 |
| 978  | 8.263  | 2.043 | 13.022 |
| 979  | 7.859  | 1.733 | 10.724 |
| 980  | 8.443  | 1.747 | 12.053 |
| 981  | 8.266  | 1.921 | 12.418 |
| 982  | 9.335  | 1.793 | 14.535 |
| 983  | 8.82   | 1.875 | 12.69  |
| 984  | 9.93   | 1.969 | 16.185 |
| 985  | 8.707  | 1.712 | 12.243 |
| 986  | 9.607  | 1.938 | 14.874 |
| 987  | 7.889  | 1.908 | 11.301 |
| 988  | 7.928  | 1.757 | 10.964 |
| 989  | 9.781  | 1.822 | 13.754 |
| 990  | 8.355  | 1.855 | 12.57  |
| 991  | 9.619  | 1.898 | 15.443 |
| 992  | 8.936  | 1.832 | 13.237 |
| 993  | 8.507  | 1.794 | 12.331 |
| 994  | 8.251  | 1.611 | 10.264 |
| 995  | 8.026  | 1.806 | 11.235 |
| 996  | 10.444 | 2.111 | 16.58  |
| 997  | 9.577  | 1.831 | 13.498 |
| 998  | 5.247  | 1.483 | 6.394  |
| 999  | 6.017  | 1.837 | 8.492  |
| 1000 | 5.374  | 1.597 | 6.857  |
| 1001 | 13.464 | 3.507 | 38.259 |
| 1002 | 12.986 | 2.725 | 31.702 |
| 1003 | 12.681 | 3.09  | 33.115 |
| 1004 | 12.46  | 3.087 | 30.864 |
| 1005 | 13.01  | 2.167 | 22.877 |
| 1006 | 14.306 | 2.985 | 33.176 |

---

---

|      |        |       |        |
|------|--------|-------|--------|
| 1007 | 12.846 | 2.711 | 27.409 |
| 1008 | 10.915 | 1.606 | 18.977 |
| 1009 | 11.807 | 2.959 | 28.63  |
| 1010 | 12.277 | 3.18  | 31.683 |
| 1011 | 11.75  | 2.866 | 26.863 |
| 1012 | 13.305 | 3.247 | 33.401 |
| 1013 | 13.646 | 3.338 | 34.154 |
| 1014 | 11.209 | 2.783 | 25.909 |
| 1015 | 9.702  | 2.311 | 17.643 |
| 1016 | 9.31   | 2.275 | 16.501 |
| 1017 | 8.788  | 2.047 | 13.741 |
| 1018 | 8.477  | 1.901 | 11.483 |
| 1019 | 8.633  | 1.875 | 11.736 |
| 1020 | 12.832 | 2.543 | 25.954 |
| 1021 | 11.725 | 2.37  | 21.716 |
| 1022 | 11.43  | 2.276 | 20.076 |
| 1023 | 11.109 | 2.032 | 17.859 |
| 1024 | 7.298  | 2.408 | 14.454 |
| 1025 | 6.666  | 2.304 | 12.889 |
| 1026 | 10.116 | 3.267 | 26.657 |
| 1027 | 10.135 | 3.278 | 26.842 |
| 1028 | 10.181 | 3.344 | 27.364 |
| 1029 | 9.416  | 3.106 | 23.681 |
| 1030 | 9.963  | 3.236 | 25.794 |
| 1031 | 9.972  | 2.552 | 20.403 |
| 1032 | 10.835 | 2.842 | 23.968 |
| 1033 | 11.779 | 2.99  | 27.55  |
| 1034 | 11.928 | 3.016 | 28.162 |
| 1035 | 12.649 | 3.939 | 37.499 |
| 1036 | 13.227 | 3.63  | 32.779 |
| 1037 | 13.047 | 3.268 | 28.208 |
| 1038 | 10.771 | 2.983 | 21.717 |
| 1039 | 10.288 | 2.761 | 18.641 |
| 1040 | 9.72   | 3.068 | 23.344 |
| 1041 | 10.083 | 3.197 | 25.351 |
| 1042 | 9.936  | 2.938 | 22.796 |
| 1043 | 10.633 | 3.145 | 27.304 |
| 1044 | 11.69  | 2.664 | 23.971 |
| 1045 | 10.737 | 2.553 | 21.057 |
| 1046 | 11.37  | 2.735 | 23.945 |
| 1047 | 11.184 | 2.586 | 22.591 |
| 1048 | 11.153 | 2.613 | 22.809 |
| 1049 | 10.725 | 2.481 | 20.839 |
| 1050 | 11.251 | 2.672 | 24.563 |
| 1051 | 11.705 | 2.696 | 25.306 |
| 1052 | 13.845 | 2.687 | 23.463 |
| 1053 | 14.524 | 2.826 | 26.353 |
| 1054 | 14.027 | 2.632 | 22.841 |

---

---

|      |        |       |        |
|------|--------|-------|--------|
| 1055 | 14.639 | 2.897 | 27.093 |
| 1056 | 13.838 | 2.823 | 26.117 |
| 1057 | 14.555 | 2.889 | 26.63  |
| 1058 | 12.671 | 2.628 | 26.051 |
| 1059 | 12.65  | 2.669 | 23.669 |
| 1060 | 13.435 | 2.574 | 23.149 |
| 1061 | 10.988 | 2.042 | 16.023 |
| 1062 | 10.979 | 1.857 | 12.313 |
| 1063 | 10.077 | 1.631 | 10.639 |
| 1064 | 10.96  | 1.967 | 16.051 |
| 1065 | 10.932 | 1.862 | 15.617 |
| 1066 | 10.259 | 1.807 | 14.281 |
| 1067 | 11.223 | 1.979 | 16.064 |
| 1068 | 10.987 | 2.109 | 16.484 |
| 1069 | 11.347 | 2.001 | 16.697 |
| 1070 | 9.035  | 2.956 | 21.752 |
| 1071 | 9.498  | 3.076 | 22.956 |
| 1072 | 10.103 | 3.193 | 25.132 |
| 1073 | 12.472 | 4.01  | 38.821 |
| 1074 | 11.666 | 3.7   | 34.875 |
| 1075 | 12.083 | 4.004 | 38.879 |
| 1076 | 12.691 | 4.341 | 43.902 |
| 1077 | 12.395 | 3.415 | 34.38  |
| 1078 | 12.754 | 3.398 | 35.634 |
| 1079 | 13.218 | 3.707 | 38.125 |
| 1080 | 11.231 | 3.062 | 25.402 |
| 1081 | 11.997 | 3.214 | 28.779 |
| 1082 | 12.475 | 3.521 | 32.589 |
| 1083 | 9.275  | 2.212 | 16.018 |
| 1084 | 9.604  | 2.345 | 18.106 |
| 1085 | 10.302 | 2.495 | 19.754 |
| 1086 | 10.563 | 2.563 | 20.865 |
| 1087 | 11.327 | 3.22  | 28.266 |
| 1088 | 12.527 | 3.603 | 34.852 |
| 1089 | 12.862 | 3.51  | 35.345 |
| 1090 | 12.349 | 3.469 | 32.765 |
| 1091 | 12.732 | 3.588 | 36.14  |
| 1092 | 12.901 | 3.607 | 36.519 |
| 1093 | 12.645 | 3.681 | 34.505 |
| 1094 | 14.068 | 3.909 | 40.086 |
| 1095 | 13.008 | 3.663 | 35.804 |
| 1096 | 5.863  | 2.159 | 10.181 |
| 1097 | 6.785  | 2.291 | 12.705 |
| 1098 | 10.037 | 2.113 | 16.953 |
| 1099 | 8.053  | 1.752 | 10.586 |
| 1100 | 8.64   | 1.859 | 11.779 |
| 1101 | 7.586  | 2.192 | 12.269 |
| 1102 | 8.052  | 2.218 | 13.349 |

---

---

|      |        |       |        |
|------|--------|-------|--------|
| 1103 | 9.085  | 2.38  | 15.324 |
| 1104 | 9.028  | 2.413 | 15.343 |
| 1105 | 12.803 | 2.973 | 27.965 |
| 1106 | 13.114 | 3.006 | 28.844 |
| 1107 | 13.21  | 3.163 | 29.403 |
| 1108 | 13.785 | 3.112 | 31.465 |
| 1109 | 13.467 | 3.04  | 30.634 |
| 1110 | 13.56  | 2.536 | 26.167 |
| 1111 | 13.388 | 2.691 | 23.768 |
| 1112 | 13.697 | 2.787 | 24.049 |
| 1113 | 11.786 | 2.203 | 20.975 |
| 1114 | 11.727 | 2.119 | 19.219 |
| 1115 | 11.779 | 2.136 | 19.545 |
| 1116 | 12.434 | 2.135 | 17.269 |
| 1117 | 12.359 | 2.156 | 18.422 |
| 1118 | 12.63  | 2.185 | 19.716 |
| 1119 | 12.297 | 2.341 | 18.071 |
| 1120 | 9.32   | 2.452 | 18.479 |
| 1121 | 9.71   | 2.481 | 19.877 |
| 1122 | 10.235 | 2.548 | 21.36  |
| 1123 | 10.451 | 2.57  | 22.071 |
| 1124 | 12.408 | 3.14  | 27.943 |
| 1125 | 12.886 | 3.364 | 32.777 |
| 1126 | 13.415 | 3.376 | 33.53  |
| 1127 | 13.877 | 3.375 | 34.523 |
| 1128 | 14.7   | 3.095 | 34.755 |
| 1129 | 15.003 | 3.094 | 36.54  |
| 1130 | 14.103 | 2.844 | 32.602 |
| 1131 | 14.392 | 2.884 | 33.489 |
| 1132 | 14.347 | 2.57  | 30.024 |
| 1133 | 14.696 | 2.768 | 32.192 |
| 1134 | 13.34  | 2.413 | 26.334 |
| 1135 | 12.679 | 2.309 | 23.571 |
| 1136 | 14.149 | 2.643 | 28.614 |
| 1137 | 11.525 | 2.141 | 17.779 |
| 1138 | 11.806 | 2.204 | 18.64  |
| 1139 | 11.879 | 2.286 | 19.157 |
| 1140 | 11.73  | 2.534 | 23.107 |
| 1141 | 11.59  | 2.379 | 22.821 |
| 1142 | 12.273 | 2.544 | 25.034 |
| 1143 | 12.996 | 2.708 | 28.233 |
| 1144 | 11.071 | 2.712 | 23.058 |
| 1145 | 11.892 | 2.949 | 26.919 |
| 1146 | 11.503 | 2.767 | 24.524 |
| 1147 | 12.156 | 2.629 | 25.529 |
| 1148 | 12.474 | 2.872 | 28.01  |
| 1149 | 12.747 | 2.802 | 27.83  |
| 1150 | 12.965 | 2.778 | 28.176 |

---



---

|      |        |       |        |
|------|--------|-------|--------|
| 1151 | 14.013 | 2.744 | 28.184 |
| 1152 | 14.279 | 2.735 | 29.877 |
| 1153 | 14.868 | 2.79  | 31.884 |
| 1154 | 12.916 | 2.329 | 22.436 |
| 1155 | 13.445 | 2.589 | 24.889 |
| 1156 | 13.222 | 2.594 | 25.074 |
| 1157 | 12.309 | 2.058 | 19.155 |
| 1158 | 12.404 | 2.06  | 20.184 |
| 1159 | 13.042 | 2.136 | 21.945 |
| 1160 | 13.435 | 2.05  | 22.763 |
| 1161 | 11.056 | 2.081 | 15.86  |
| 1162 | 10.773 | 2.418 | 20.456 |
| 1163 | 12.885 | 2.63  | 26.821 |
| 1164 | 13.39  | 2.764 | 29.083 |
| 1165 | 12.729 | 2.642 | 27.306 |
| 1166 | 12     | 2.538 | 24.251 |
| 1167 | 13.26  | 2.126 | 25.056 |
| 1168 | 12.62  | 2.028 | 21.464 |
| 1169 | 12.479 | 2.116 | 21.126 |
| 1170 | 9.825  | 1.805 | 14.172 |
| 1171 | 10.103 | 1.854 | 14.718 |
| 1172 | 11.401 | 2.084 | 18.193 |
| 1173 | 9.709  | 1.565 | 13.519 |
| 1174 | 10.686 | 1.735 | 15.675 |
| 1175 | 10.157 | 1.727 | 14.847 |
| 1176 | 11.836 | 2.165 | 20.262 |
| 1177 | 11.319 | 2.157 | 20.435 |
| 1178 | 10.472 | 2.153 | 18.444 |
| 1179 | 10.416 | 2.038 | 17.64  |
| 1180 | 7.128  | 1.809 | 10.333 |
| 1181 | 6.612  | 1.617 | 9.287  |
| 1182 | 6.869  | 1.738 | 9.818  |
| 1183 | 10.02  | 2.071 | 16.083 |
| 1184 | 10.247 | 2.136 | 17.626 |
| 1185 | 13.085 | 3.016 | 31.764 |
| 1186 | 13.454 | 3.105 | 34.064 |
| 1187 | 13.769 | 2.98  | 33.9   |
| 1188 | 12.579 | 2.691 | 26.2   |
| 1189 | 10.873 | 2.429 | 20.016 |
| 1190 | 9.47   | 2.627 | 18.679 |
| 1191 | 9.623  | 2.608 | 18.615 |
| 1192 | 10.268 | 2.793 | 21.194 |
| 1193 | 12.962 | 3.123 | 30.15  |
| 1194 | 12.776 | 3.064 | 29.594 |
| 1195 | 13.305 | 3.221 | 31.787 |
| 1196 | 14.013 | 2.872 | 28.353 |
| 1197 | 14.732 | 3.04  | 33.192 |
| 1198 | 14.977 | 3.016 | 32.377 |

---

---

|      |        |       |        |
|------|--------|-------|--------|
| 1199 | 14.906 | 3.1   | 35.612 |
| 1200 | 16.309 | 3.619 | 43.679 |
| 1201 | 15.621 | 3.47  | 42.84  |
| 1202 | 9.257  | 2.329 | 17.088 |
| 1203 | 10.031 | 2.424 | 19.58  |
| 1204 | 10.451 | 2.504 | 20.985 |
| 1205 | 12.334 | 2.546 | 26.881 |
| 1206 | 13.183 | 2.724 | 30.743 |
| 1207 | 12.75  | 2.827 | 29.522 |
| 1208 | 11.621 | 2.096 | 17.434 |
| 1209 | 11.875 | 2.076 | 18.228 |
| 1210 | 13.188 | 2.346 | 22.27  |
| 1211 | 11.189 | 3.006 | 25.661 |
| 1212 | 11.265 | 3.044 | 26.645 |
| 1213 | 11.102 | 3.078 | 25.696 |
| 1214 | 11.652 | 2.62  | 23.798 |
| 1215 | 11.036 | 2.369 | 21.546 |
| 1216 | 11.738 | 2.713 | 25.268 |
| 1217 | 9.268  | 2.35  | 16.693 |
| 1218 | 11.338 | 2.808 | 24.387 |
| 1219 | 10.286 | 2.051 | 17.037 |
| 1220 | 10.123 | 2.016 | 16.771 |
| 1221 | 10.122 | 1.983 | 15.844 |
| 1222 | 12.767 | 2.923 | 30.685 |
| 1223 | 11.3   | 2.564 | 23.8   |
| 1224 | 12.397 | 2.761 | 28.284 |
| 1225 | 10.852 | 2.12  | 17.239 |
| 1226 | 11.914 | 2.457 | 23.992 |
| 1227 | 10.894 | 2.882 | 24.303 |
| 1228 | 11.018 | 2.903 | 25.015 |
| 1229 | 10.567 | 2.655 | 21.374 |
| 1230 | 12.267 | 3.037 | 27.448 |
| 1231 | 11.3   | 2.397 | 22.392 |
| 1232 | 13.635 | 4.044 | 41.03  |
| 1233 | 11.507 | 2.536 | 22.593 |
| 1234 | 9.207  | 2.024 | 14.624 |
| 1235 | 9.237  | 2.346 | 17.701 |
| 1236 | 11.122 | 2.724 | 24.319 |
| 1237 | 10.002 | 2.398 | 19.457 |
| 1238 | 10.08  | 2.683 | 21.51  |
| 1239 | 10.427 | 2.261 | 19.354 |
| 1240 | 10.27  | 2.067 | 15.994 |
| 1241 | 7.333  | 1.914 | 10.832 |
| 1242 | 8.635  | 2.173 | 14.236 |
| 1243 | 8.627  | 2.116 | 13.964 |
| 1244 | 8.762  | 2.032 | 13.641 |
| 1245 | 8.246  | 1.952 | 12.404 |
| 1246 | 11.028 | 2.274 | 18.083 |

---

---

|      |        |       |        |
|------|--------|-------|--------|
| 1247 | 9.085  | 2.141 | 16.069 |
| 1248 | 9.547  | 2.38  | 16.682 |
| 1249 | 13.368 | 3.891 | 39.325 |
| 1250 | 9.03   | 2.275 | 15.881 |
| 1251 | 10.872 | 2.408 | 20.104 |
| 1252 | 10.805 | 2.688 | 24.209 |
| 1253 | 10.163 | 2.444 | 20.704 |
| 1254 | 9.274  | 2.275 | 16.988 |
| 1255 | 9.6    | 2.505 | 19.495 |
| 1256 | 9.503  | 2.151 | 16.32  |
| 1257 | 9.99   | 2.055 | 15.426 |
| 1258 | 7.655  | 2.027 | 12.119 |
| 1259 | 8.67   | 2.146 | 13.743 |
| 1260 | 9.457  | 1.711 | 13.414 |
| 1261 | 9.517  | 1.681 | 12.448 |
| 1262 | 10.114 | 2.178 | 16.827 |
| 1263 | 9.09   | 1.845 | 12.942 |
| 1264 | 10.413 | 1.898 | 16.396 |
| 1265 | 7.535  | 1.684 | 9.302  |
| 1266 | 11.776 | 2.757 | 25.196 |
| 1267 | 10.184 | 2.565 | 19.526 |
| 1268 | 10.166 | 2.567 | 19.311 |
| 1269 | 12.78  | 2.954 | 27.893 |
| 1270 | 13.112 | 3.022 | 29.045 |
| 1271 | 11.816 | 2.742 | 24.038 |
| 1272 | 13.241 | 3.12  | 30.006 |
| 1273 | 9.625  | 2.532 | 17.438 |
| 1274 | 11.276 | 2.672 | 22.629 |
| 1275 | 11.183 | 2.757 | 23.236 |
| 1276 | 11.753 | 2.845 | 24.691 |
| 1277 | 12.177 | 3.451 | 30.741 |
| 1278 | 12.152 | 3.489 | 31.327 |
| 1279 | 12.186 | 3.701 | 34.248 |
| 1280 | 13.68  | 3.333 | 32.801 |
| 1281 | 10.852 | 2.377 | 20.649 |
| 1282 | 8.849  | 2.284 | 14.261 |
| 1283 | 9.87   | 2.438 | 16.642 |
| 1284 | 9.42   | 2.285 | 15.976 |
| 1285 | 9.726  | 2.437 | 18.018 |
| 1286 | 9.849  | 2.432 | 18.066 |
| 1287 | 10.18  | 2.486 | 18.883 |
| 1288 | 13.021 | 3.781 | 37.454 |
| 1289 | 10.836 | 2.713 | 24.476 |
| 1290 | 10.645 | 2.3   | 19.345 |
| 1291 | 10.514 | 2.239 | 18.147 |
| 1292 | 13.206 | 3.313 | 36.353 |
| 1293 | 10.678 | 1.94  | 15.749 |
| 1294 | 10.082 | 1.784 | 13.626 |

---

---

|      |        |       |        |
|------|--------|-------|--------|
| 1295 | 10.531 | 1.829 | 14.679 |
| 1296 | 10.574 | 1.815 | 14.767 |
| 1297 | 12.29  | 2.188 | 20.227 |
| 1298 | 11.854 | 2.142 | 16.652 |
| 1299 | 11.549 | 2.142 | 20.517 |
| 1300 | 12.216 | 2.276 | 22.503 |
| 1301 | 12.208 | 2.34  | 22.827 |
| 1302 | 9.769  | 2.395 | 19.007 |
| 1303 | 9.599  | 2.414 | 18.483 |
| 1304 | 9.749  | 2.379 | 18.474 |
| 1305 | 10.736 | 2.625 | 20.983 |
| 1306 | 10.418 | 2.454 | 20.319 |
| 1307 | 10.663 | 2.571 | 22.021 |
| 1308 | 9.709  | 2.834 | 16.173 |
| 1309 | 10.024 | 2.814 | 22.953 |
| 1310 | 10.052 | 2.778 | 22.828 |
| 1311 | 10.305 | 2.892 | 23.765 |
| 1312 | 10.198 | 2.848 | 22.766 |
| 1313 | 9.755  | 2.776 | 22.278 |
| 1314 | 11.506 | 3.266 | 30.028 |
| 1315 | 11.368 | 3.34  | 29.878 |
| 1316 | 11.524 | 3.376 | 31.235 |
| 1317 | 12.064 | 3.495 | 33.325 |
| 1318 | 11.797 | 3.241 | 29.182 |
| 1319 | 11.382 | 3.15  | 28.04  |
| 1320 | 11.542 | 3.186 | 28.157 |
| 1321 | 12.067 | 2.469 | 23.777 |
| 1322 | 12.001 | 2.463 | 24.113 |
| 1323 | 11.66  | 2.469 | 23.066 |
| 1324 | 11.995 | 2.551 | 24.973 |
| 1325 | 11.886 | 2.65  | 25.608 |
| 1326 | 9.903  | 2.046 | 15.85  |
| 1327 | 9.976  | 2.025 | 16.247 |
| 1328 | 10.132 | 2.101 | 17.022 |
| 1329 | 10.151 | 2.089 | 16.701 |
| 1330 | 10.28  | 2.079 | 17.197 |
| 1331 | 10.356 | 2.084 | 17.245 |
| 1332 | 10.261 | 2.273 | 15.984 |
| 1333 | 10.609 | 2.305 | 16.625 |
| 1334 | 10.52  | 2.342 | 16.895 |
| 1335 | 10.561 | 2.302 | 16.578 |
| 1336 | 10.647 | 2.245 | 17.078 |
| 1337 | 10.728 | 2.367 | 17.626 |
| 1338 | 8.454  | 1.623 | 10.867 |
| 1339 | 9.551  | 1.904 | 13.483 |
| 1340 | 9.091  | 1.941 | 12.208 |
| 1341 | 9.284  | 1.776 | 12.685 |
| 1342 | 9.043  | 1.849 | 12.443 |

---

---

|      |        |       |        |
|------|--------|-------|--------|
| 1343 | 10.273 | 1.714 | 15.027 |
| 1344 | 10.112 | 1.755 | 14.393 |
| 1345 | 10.13  | 1.62  | 14.137 |
| 1346 | 9.436  | 1.926 | 13.797 |
| 1347 | 10.208 | 1.67  | 14.738 |
| 1348 | 10.475 | 1.712 | 15.393 |
| 1349 | 10.005 | 1.542 | 14.008 |
| 1350 | 10.481 | 1.603 | 15.051 |
| 1351 | 10.618 | 1.7   | 15.359 |
| 1352 | 10.991 | 1.708 | 15.355 |
| 1353 | 10.965 | 1.693 | 15.363 |
| 1354 | 10.014 | 1.838 | 13.958 |
| 1355 | 10.219 | 1.824 | 14.27  |
| 1356 | 10.241 | 1.73  | 14.064 |
| 1357 | 10.511 | 1.838 | 14.318 |
| 1358 | 10.456 | 1.768 | 14.003 |
| 1359 | 10.246 | 1.784 | 14.38  |
| 1360 | 10.251 | 1.764 | 13.796 |
| 1361 | 7.565  | 1.442 | 8.482  |
| 1362 | 7.776  | 1.663 | 9.798  |
| 1363 | 7.092  | 1.525 | 8.286  |
| 1364 | 9.145  | 2.185 | 15.851 |
| 1365 | 9.679  | 2.24  | 16.866 |
| 1366 | 9.521  | 2.245 | 16.806 |
| 1367 | 9.517  | 2.196 | 16.309 |
| 1368 | 12.374 | 4.032 | 35.517 |
| 1369 | 11.788 | 3.685 | 33.895 |
| 1370 | 10.992 | 3.396 | 30.082 |
| 1371 | 10.793 | 3.324 | 29.036 |
| 1372 | 11.023 | 3.421 | 29.918 |
| 1373 | 11.012 | 3.417 | 29.87  |
| 1374 | 11.08  | 3.473 | 30.222 |
| 1375 | 11.419 | 3.166 | 28.582 |
| 1376 | 11.931 | 3.248 | 29.154 |
| 1377 | 13.275 | 2.538 | 25.76  |
| 1378 | 12.212 | 2.312 | 21.813 |
| 1379 | 12.265 | 2.365 | 22.541 |
| 1380 | 12.014 | 2.334 | 21.947 |
| 1381 | 12.171 | 2.37  | 22.219 |
| 1382 | 12.172 | 2.466 | 23.052 |
| 1383 | 10.581 | 1.64  | 13.715 |
| 1384 | 10.396 | 1.786 | 12.874 |
| 1385 | 8.846  | 1.65  | 12.151 |
| 1386 | 10.657 | 1.646 | 13.895 |
| 1387 | 10.514 | 1.613 | 14.177 |
| 1388 | 10.725 | 1.638 | 14.252 |
| 1389 | 10.621 | 1.621 | 14.158 |
| 1390 | 11.07  | 1.767 | 15.268 |

---

---

|      |        |       |        |
|------|--------|-------|--------|
| 1391 | 10.732 | 1.782 | 15.403 |
| 1392 | 6.131  | 1.506 | 6.875  |
| 1393 | 6.413  | 1.542 | 7.659  |
| 1394 | 5.928  | 1.42  | 6.646  |
| 1395 | 6.373  | 1.583 | 7.344  |
| 1396 | 6.544  | 1.544 | 7.858  |
| 1397 | 11.453 | 3.268 | 28.763 |
| 1398 | 11.665 | 3.189 | 27.794 |
| 1399 | 9.974  | 1.545 | 12.091 |
| 1400 | 10.087 | 1.593 | 12.551 |
| 1401 | 10.138 | 1.599 | 12.746 |
| 1402 | 10.128 | 1.632 | 12.915 |
| 1403 | 9.911  | 1.561 | 12.27  |
| 1404 | 9.916  | 1.507 | 12.059 |
| 1405 | 9.14   | 1.938 | 13.647 |
| 1406 | 9.204  | 1.955 | 13.941 |
| 1407 | 9.739  | 2.997 | 23.194 |
| 1408 | 9.192  | 2.872 | 21.441 |
| 1409 | 9.555  | 3.008 | 23.116 |
| 1410 | 9.558  | 3.001 | 23.57  |
| 1411 | 9.46   | 3.009 | 23.246 |
| 1412 | 9.716  | 3.066 | 23.187 |
| 1413 | 10.036 | 3.125 | 24.975 |
| 1414 | 10.053 | 3.012 | 24.318 |
| 1415 | 10.082 | 3.044 | 24.341 |
| 1416 | 8.966  | 2.064 | 13.485 |
| 1417 | 9.001  | 2.11  | 14.241 |
| 1418 | 9.588  | 2.226 | 15.853 |
| 1419 | 9.684  | 2.241 | 16.451 |
| 1420 | 9.435  | 2.286 | 16.282 |
| 1421 | 9.668  | 2.259 | 16.316 |
| 1422 | 9.912  | 2.277 | 16.932 |
| 1423 | 9.937  | 2.267 | 16.885 |
| 1424 | 10.022 | 2.3   | 17.424 |
| 1425 | 10.069 | 2.335 | 17.299 |
| 1426 | 10.479 | 2.624 | 20.987 |
| 1427 | 10.359 | 2.573 | 20.11  |
| 1428 | 11.21  | 2.769 | 22.887 |
| 1429 | 10.851 | 2.64  | 21.387 |
| 1430 | 10.697 | 2.683 | 21.356 |
| 1431 | 11.097 | 2.771 | 23.523 |
| 1432 | 10.751 | 2.672 | 21.779 |
| 1433 | 10.865 | 2.633 | 21.614 |
| 1434 | 9.401  | 1.969 | 14.377 |
| 1435 | 9.63   | 2.001 | 14.639 |
| 1436 | 9.538  | 2.065 | 14.934 |
| 1437 | 9.342  | 2.008 | 14.52  |
| 1438 | 9.343  | 2.065 | 14.798 |

---

---

|      |        |       |        |
|------|--------|-------|--------|
| 1439 | 9.12   | 1.975 | 14.103 |
| 1440 | 9.269  | 2.042 | 14.844 |
| 1441 | 9.15   | 2.034 | 14.617 |
| 1442 | 8.803  | 2.062 | 14.227 |
| 1443 | 9.252  | 2.044 | 14.968 |
| 1444 | 9.375  | 2.077 | 15.026 |
| 1445 | 9.207  | 1.749 | 12.911 |
| 1446 | 9.082  | 1.768 | 13.071 |
| 1447 | 9.397  | 1.821 | 13.62  |
| 1448 | 9.396  | 1.824 | 13.801 |
| 1449 | 9.536  | 1.886 | 14.29  |
| 1450 | 9.555  | 1.933 | 15.08  |
| 1451 | 8.309  | 1.629 | 10.362 |
| 1452 | 8.69   | 1.688 | 11.142 |
| 1453 | 8.859  | 1.724 | 11.735 |
| 1454 | 8.665  | 1.753 | 11.878 |
| 1455 | 8.93   | 1.807 | 12.08  |
| 1456 | 8.928  | 1.877 | 12.544 |
| 1457 | 8.843  | 1.763 | 11.61  |
| 1458 | 8.756  | 1.771 | 11.807 |
| 1459 | 9.697  | 1.735 | 13.423 |
| 1460 | 10.077 | 1.899 | 14.686 |
| 1461 | 10.007 | 1.622 | 12.227 |
| 1462 | 9.747  | 1.772 | 13.077 |
| 1463 | 9.134  | 1.593 | 11.084 |
| 1464 | 9.458  | 1.564 | 11.711 |
| 1465 | 9.428  | 1.501 | 11.319 |
| 1466 | 9.304  | 1.482 | 10.675 |
| 1467 | 9.32   | 1.491 | 10.809 |
| 1468 | 7.865  | 1.559 | 9.664  |
| 1469 | 7.883  | 1.598 | 9.825  |
| 1470 | 8.062  | 1.679 | 10.47  |
| 1471 | 8.627  | 1.753 | 11.96  |
| 1472 | 8.389  | 1.686 | 11.152 |
| 1473 | 8.682  | 1.776 | 11.539 |
| 1474 | 8.319  | 1.67  | 10.764 |
| 1475 | 8.292  | 1.641 | 10.634 |
| 1476 | 8.802  | 1.866 | 12.558 |
| 1477 | 8.648  | 1.806 | 11.869 |
| 1478 | 8.5    | 1.782 | 11.827 |
| 1479 | 8.233  | 1.763 | 11.177 |
| 1480 | 10.182 | 2.743 | 20.361 |
| 1481 | 10.52  | 2.944 | 21.823 |
| 1482 | 10.607 | 2.958 | 22.633 |
| 1483 | 10.309 | 2.835 | 21.678 |
| 1484 | 10.551 | 2.784 | 23.898 |
| 1485 | 10.662 | 2.694 | 23.842 |
| 1486 | 10.681 | 2.736 | 24.363 |

---

---

|      |        |       |        |
|------|--------|-------|--------|
| 1487 | 10.654 | 2.863 | 24.145 |
| 1488 | 10.623 | 2.715 | 23.248 |
| 1489 | 10.616 | 2.81  | 24.103 |
| 1490 | 10.639 | 3.016 | 24.664 |
| 1491 | 10.726 | 3.089 | 25.712 |
| 1492 | 10.732 | 3.038 | 25.263 |
| 1493 | 11.981 | 3.364 | 31.263 |
| 1494 | 12.162 | 3.436 | 31.487 |
| 1495 | 12.067 | 3.421 | 32.244 |
| 1496 | 12.075 | 3.316 | 31.521 |
| 1497 | 11.719 | 3.207 | 29.295 |
| 1498 | 9.13   | 2.632 | 18.796 |
| 1499 | 11.133 | 2.747 | 23.785 |
| 1500 | 10.089 | 2.923 | 24.877 |
| 1501 | 10.349 | 3.036 | 25.642 |
| 1502 | 10.6   | 3.056 | 26.059 |
| 1503 | 10.777 | 3.227 | 27.925 |
| 1504 | 10.775 | 3.119 | 27.661 |
| 1505 | 10.642 | 3.191 | 27.975 |
| 1506 | 10.995 | 3.043 | 26.91  |
| 1507 | 10.346 | 3.07  | 25.844 |
| 1508 | 8.431  | 1.653 | 10.083 |
| 1509 | 8.268  | 1.585 | 9.977  |
| 1510 | 8.263  | 1.616 | 10.037 |
| 1511 | 8.261  | 1.587 | 10.076 |
| 1512 | 8.112  | 1.551 | 9.662  |
| 1513 | 8.148  | 1.564 | 9.787  |
| 1514 | 8.295  | 1.578 | 10.12  |
| 1515 | 8.282  | 1.568 | 10.099 |
| 1516 | 8.224  | 1.608 | 10.151 |
| 1517 | 8.413  | 1.641 | 10.334 |
| 1518 | 8.44   | 1.654 | 10.625 |
| 1519 | 8.087  | 1.674 | 9.997  |
| 1520 | 6.579  | 1.581 | 7.841  |
| 1521 | 6.931  | 1.579 | 8.46   |
| 1522 | 6.508  | 1.551 | 7.961  |
| 1523 | 6.524  | 1.524 | 7.996  |
| 1524 | 6.551  | 1.528 | 8.095  |
| 1525 | 6.309  | 1.545 | 7.438  |
| 1526 | 6.565  | 1.623 | 7.874  |
| 1527 | 6.405  | 1.582 | 8.281  |
| 1528 | 9.761  | 1.774 | 15.239 |
| 1529 | 10.091 | 1.931 | 15.375 |
| 1530 | 9.324  | 1.823 | 12.7   |
| 1531 | 9.395  | 3.45  | 25.928 |
| 1532 | 10.075 | 3.848 | 30.411 |
| 1533 | 10.112 | 3.767 | 29.472 |
| 1534 | 10.092 | 3.697 | 30.218 |

---



---

|      |        |       |        |
|------|--------|-------|--------|
| 1535 | 9.707  | 3.676 | 27.74  |
| 1536 | 9.536  | 3.59  | 26.704 |
| 1537 | 10.317 | 3.781 | 30.629 |
| 1538 | 10.197 | 3.732 | 29.511 |
| 1539 | 9.962  | 1.793 | 13.384 |
| 1540 | 13.469 | 2.537 | 26.48  |
| 1541 | 13.582 | 2.547 | 26.411 |
| 1542 | 13.483 | 2.46  | 26.248 |
| 1543 | 13.457 | 2.4   | 26.058 |
| 1544 | 13.112 | 2.373 | 24.809 |
| 1545 | 13.131 | 2.394 | 25.237 |
| 1546 | 12.59  | 2.3   | 22.977 |
| 1547 | 12.267 | 2.188 | 21.827 |
| 1548 | 12.216 | 2.264 | 22.019 |
| 1549 | 12.462 | 2.201 | 22.537 |
| 1550 | 11.26  | 2.289 | 25.022 |
| 1551 | 11.404 | 2.264 | 20.379 |
| 1552 | 10.919 | 2.2   | 18.865 |
| 1553 | 10.817 | 2.192 | 18.881 |
| 1554 | 10.639 | 2.147 | 17.716 |
| 1555 | 10.472 | 2.109 | 17.963 |
| 1556 | 10.771 | 2.17  | 18.512 |
| 1557 | 10.789 | 2.161 | 18.662 |
| 1558 | 10.368 | 2.076 | 17.372 |
| 1559 | 10.417 | 2.075 | 17.418 |
| 1560 | 10.463 | 2.076 | 17.601 |
| 1561 | 10.491 | 2.064 | 17.236 |
| 1562 | 10.315 | 1.812 | 13.839 |
| 1563 | 10.299 | 1.825 | 13.26  |
| 1564 | 10.268 | 1.843 | 13.38  |
| 1565 | 9.758  | 1.686 | 12.337 |
| 1566 | 9.767  | 1.662 | 12.32  |
| 1567 | 10     | 1.817 | 12.906 |
| 1568 | 10.046 | 1.767 | 12.672 |
| 1569 | 11.528 | 1.527 | 14.182 |
| 1570 | 11.607 | 1.53  | 14.246 |
| 1571 | 11.716 | 1.506 | 14.459 |
| 1572 | 12.011 | 1.657 | 14.955 |
| 1573 | 11.458 | 1.496 | 13.636 |
| 1574 | 11.655 | 1.552 | 13.823 |
| 1575 | 8.056  | 1.562 | 9.516  |
| 1576 | 8.707  | 1.623 | 10.681 |
| 1577 | 8.291  | 1.511 | 9.335  |
| 1578 | 8.329  | 1.547 | 9.648  |
| 1579 | 8.094  | 1.504 | 9.055  |
| 1580 | 7.604  | 1.436 | 8.203  |
| 1581 | 7.754  | 1.494 | 8.913  |
| 1582 | 8.168  | 1.512 | 9.084  |

---

|      |       |       |       |
|------|-------|-------|-------|
| 1583 | 8.115 | 1.484 | 9.255 |
| 1584 | 8.232 | 1.378 | 8.474 |
| 1585 | 8.503 | 1.337 | 8.898 |
| 1586 | 8.513 | 1.375 | 8.743 |
| 1587 | 8.141 | 1.302 | 8.214 |
| 1588 | 8.516 | 1.362 | 8.927 |
| 1589 | 8.47  | 1.45  | 8.989 |
